# Supplementary material
Source: PubMed Central journal article supplement (PMC3831356)
Supplement: NIHMS508703-supplement-Supplementary_Table_1.pdf [file NIHMS508703-supplement-Supplementary_Table_1.pdf]

**SUPPLEMENTAL MATERIAL:**

**Table 1: comparison analysis between the two groups of patients (EH and RAS patients) with or without statins therapy.**

|                                                          | <b>EH=32</b> | <b>Statin (=16)</b> | <b>No Statin (=16)</b> | <b>P value</b> | <b>RAS=17</b> | <b>Statin (=12)</b> | <b>No statin (=5)</b> | <b>P value</b> |
|----------------------------------------------------------|--------------|---------------------|------------------------|----------------|---------------|---------------------|-----------------------|----------------|
| <b>RBF (ml/min)</b>                                      |              | 379.5 ± 188         | 421.6 ± 161            | 0.5            |               | 226.8 ±106.8        | 247.3 v 160           | 0.7            |
| <b>Single kidney GFR(ml/min)</b>                         |              | 42.5 ± 12.9         | 46.5 ± 14              | 0.4            |               | 26 ± 10.9           | 32.4 ± 25             | 0.6            |
| <b>Cortical R2* (sec<sup>-1</sup>)</b>                   |              | 19.1 ± 3.2          | 17.8 ± 1.9             | 0.18           |               | 20.2 ± 3.1          | 24.5 ± 7.9            | 0.36           |
| <b>Fractional hypoxia (%R2* &gt;30 sec<sup>-1</sup>)</b> |              | 10.8 ± 8.2          | 8.2 ± 5                | 0.3            |               | 19.4 ± 11.7         | 33.1 ± 27             | 0.38           |
| <b>NGAL (ng/ml)</b>                                      |              | 69.3 ± 43.9         | 70.5 ± 18.6            | 0.9            |               | 133.1 ± 62          | 94.6 ± 39             | 0.3            |
| <b>MCP-1 (pg/ml)</b>                                     |              | 171.7 ± 83          | 137.7 ± 55.5           | 0.2            |               | 238 ± 77            | 166.6 ± 47.6          | 0.1            |
| <b>TNF-a (pg/ml)</b>                                     |              | 4.5 ± 2.5           | 3.7 ± 2.2              | 0.7            |               | 25.2 ± 15           | 7.1 ± 2.1             | 0.3            |

Mean ± SD.
